# Supplementary material for: Microwave assisted synthesis, crystal structure and modelling of cytotoxic dehydroacetic acid enamine: a natural alkaloid from Fusarium incarnatum (HKI0504)
Source: Royal Society of Chemistry journal article supplement (doi:10.1039/c4ra00582a), 2014-01-01
Supplement: c4ra00582a1.pdf [file c4ra00582a1.pdf]

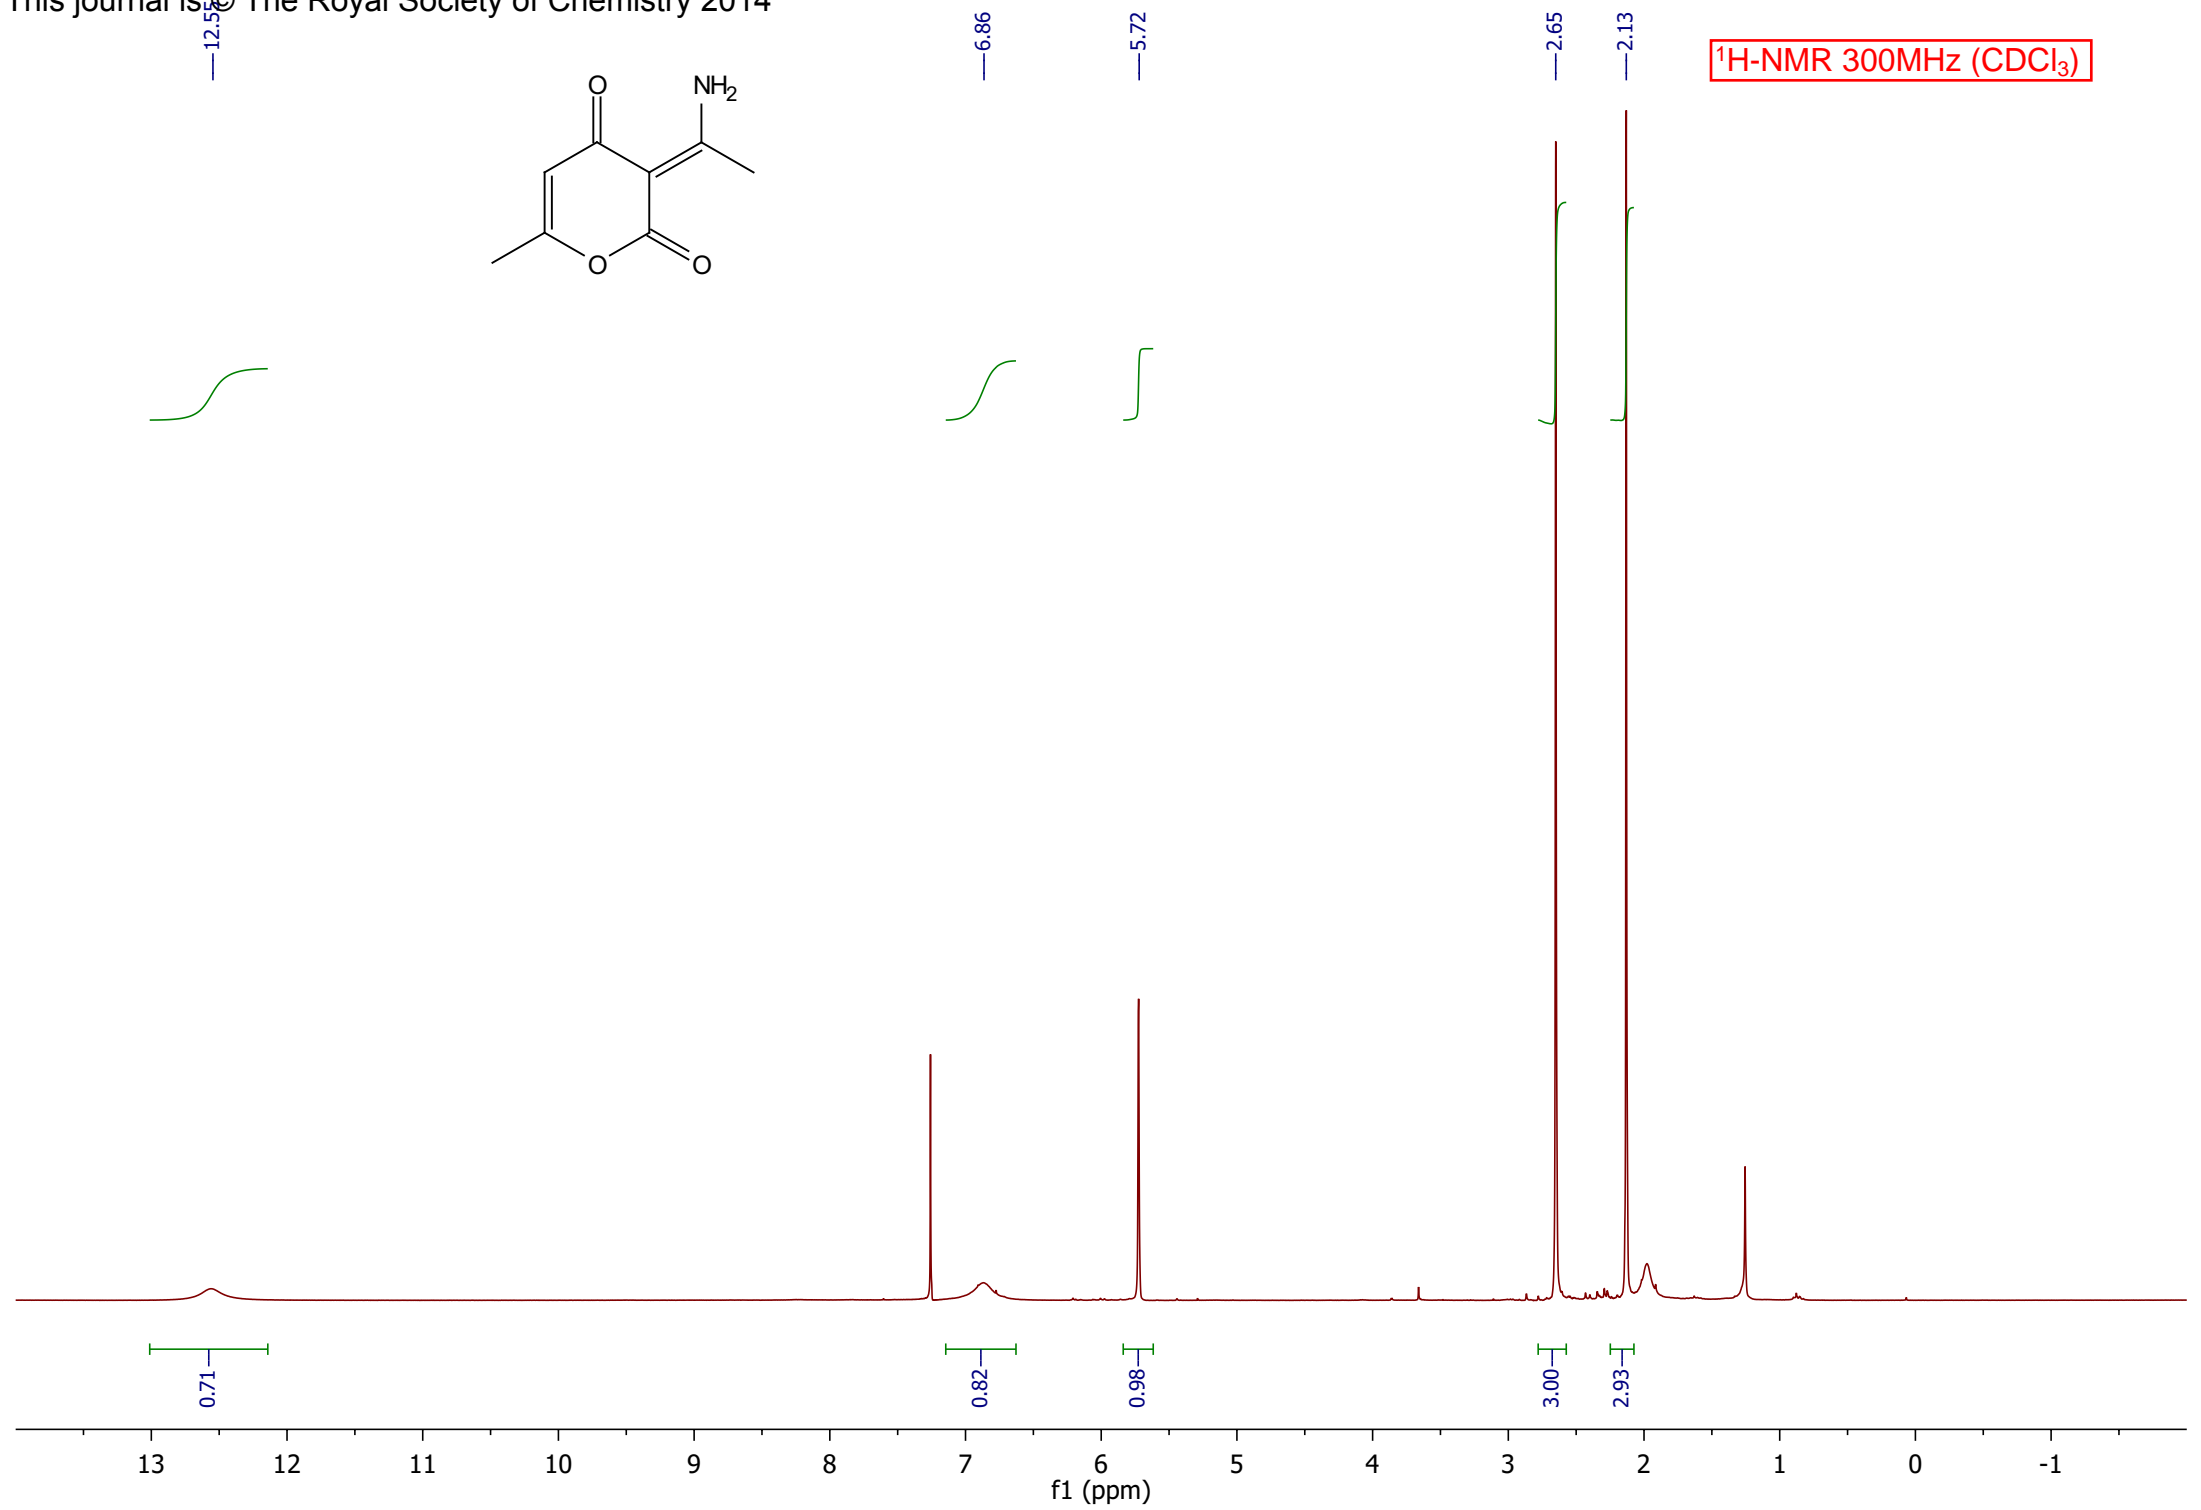

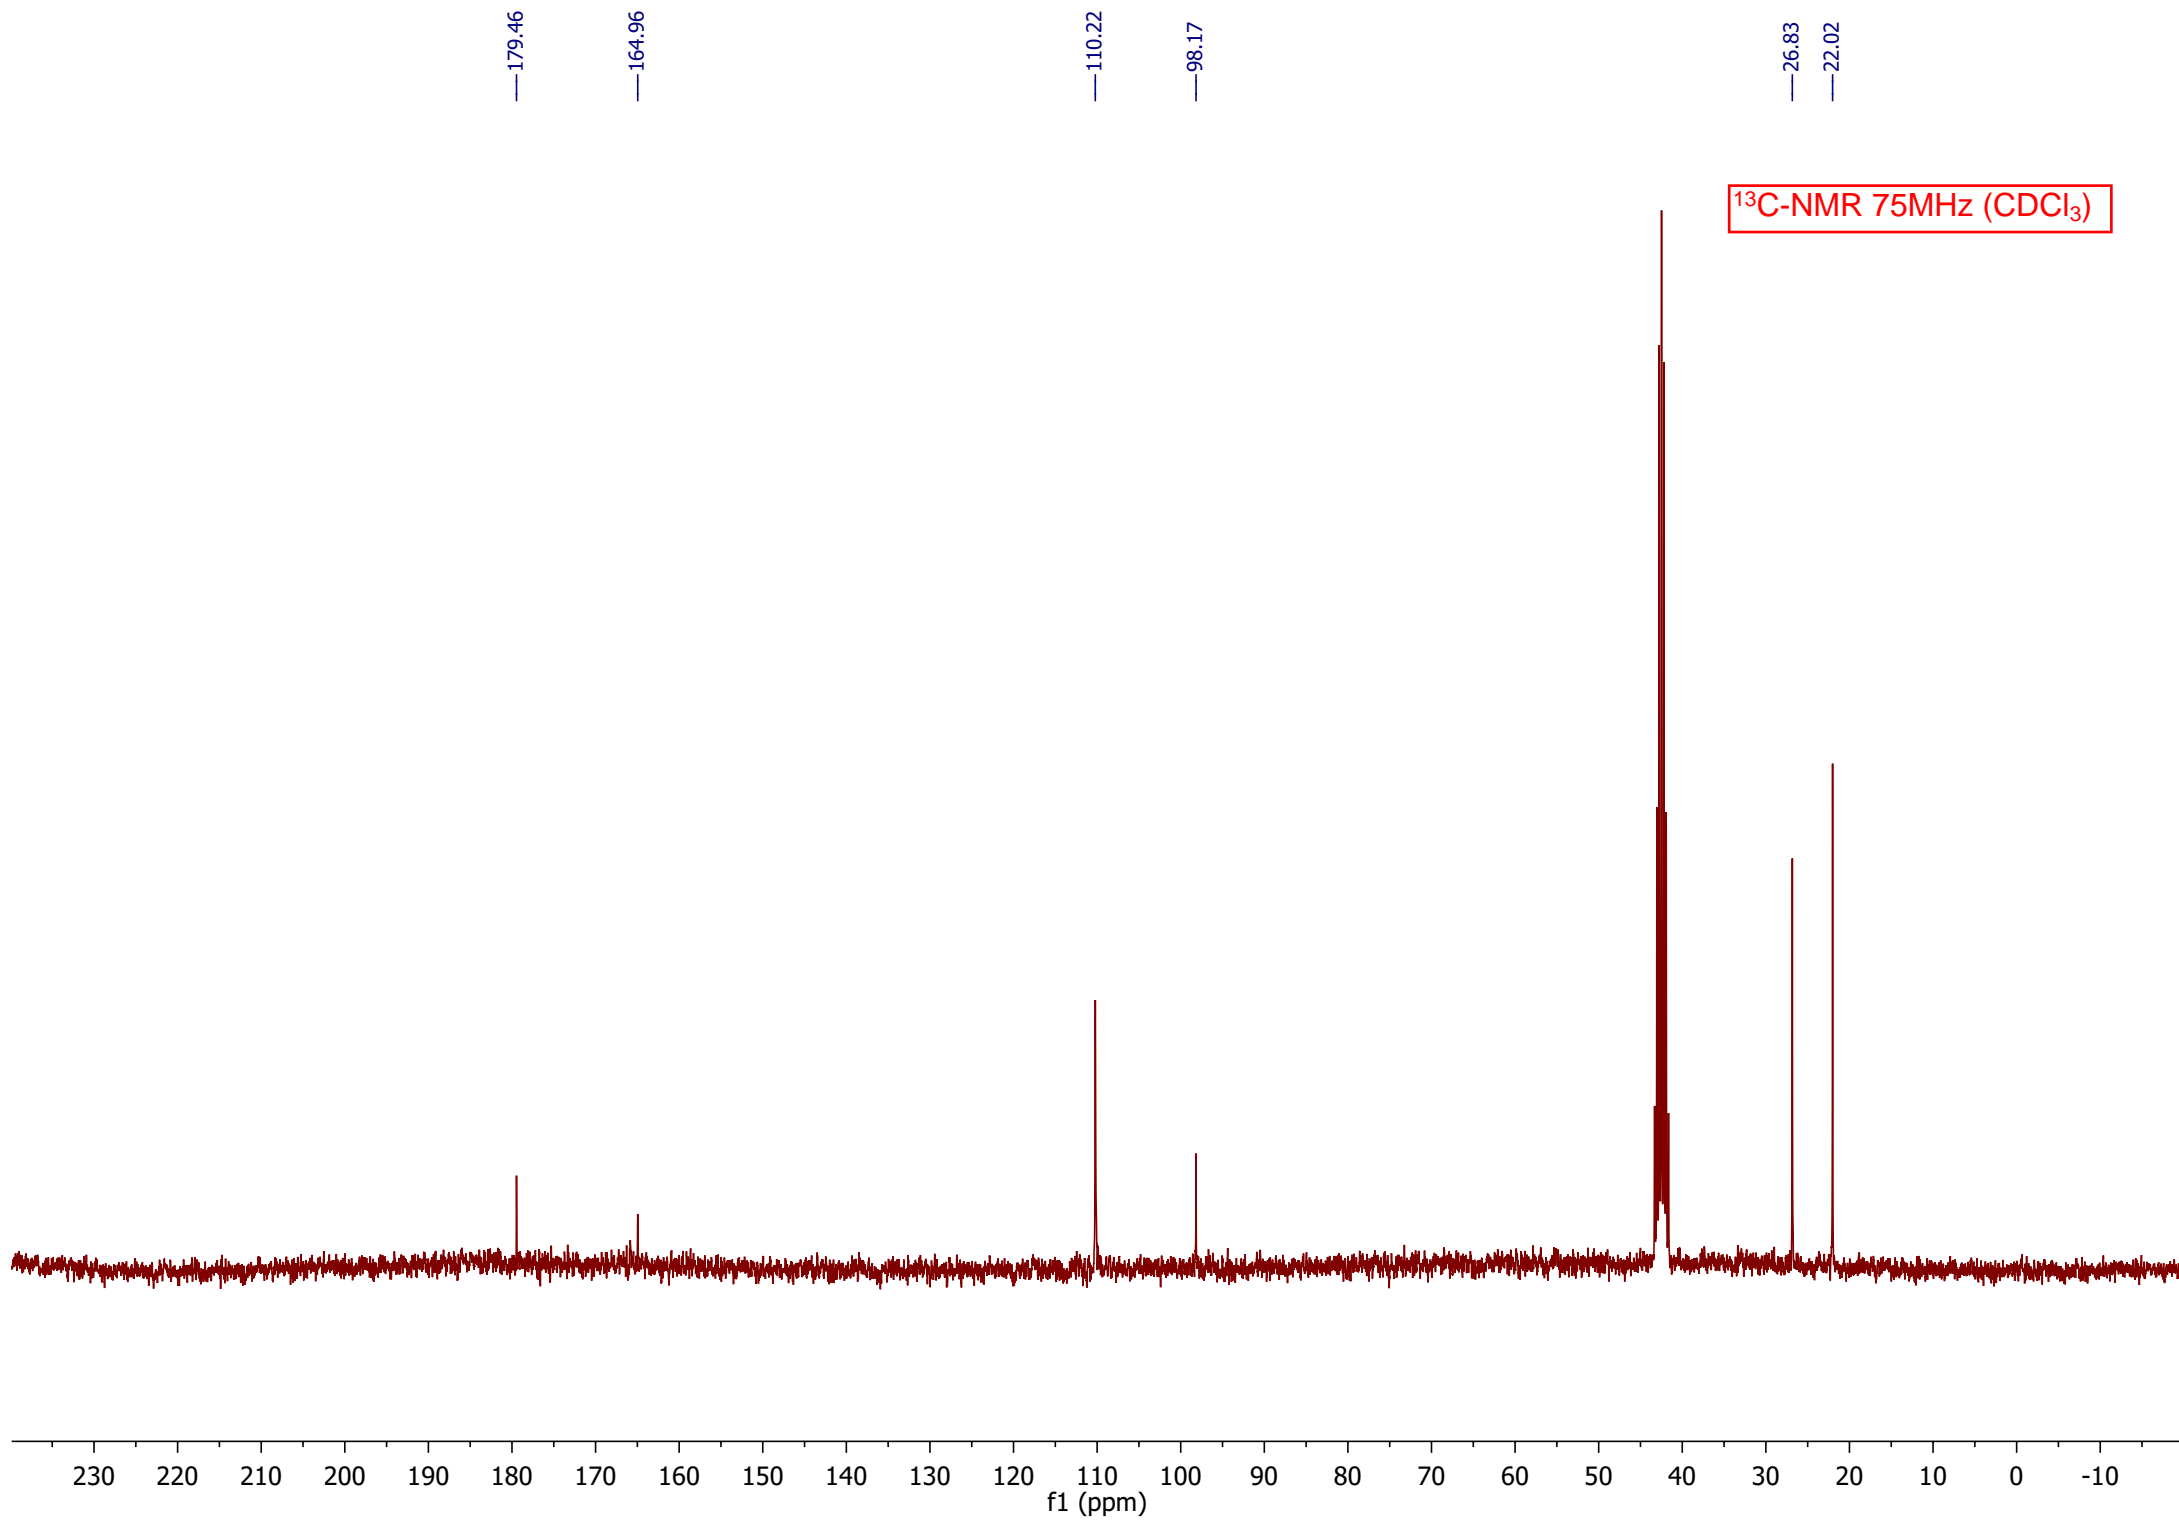

DEPT 135  $^{13}\text{C}$ -NMR 75MHz ( $\text{CDCl}_3$ )

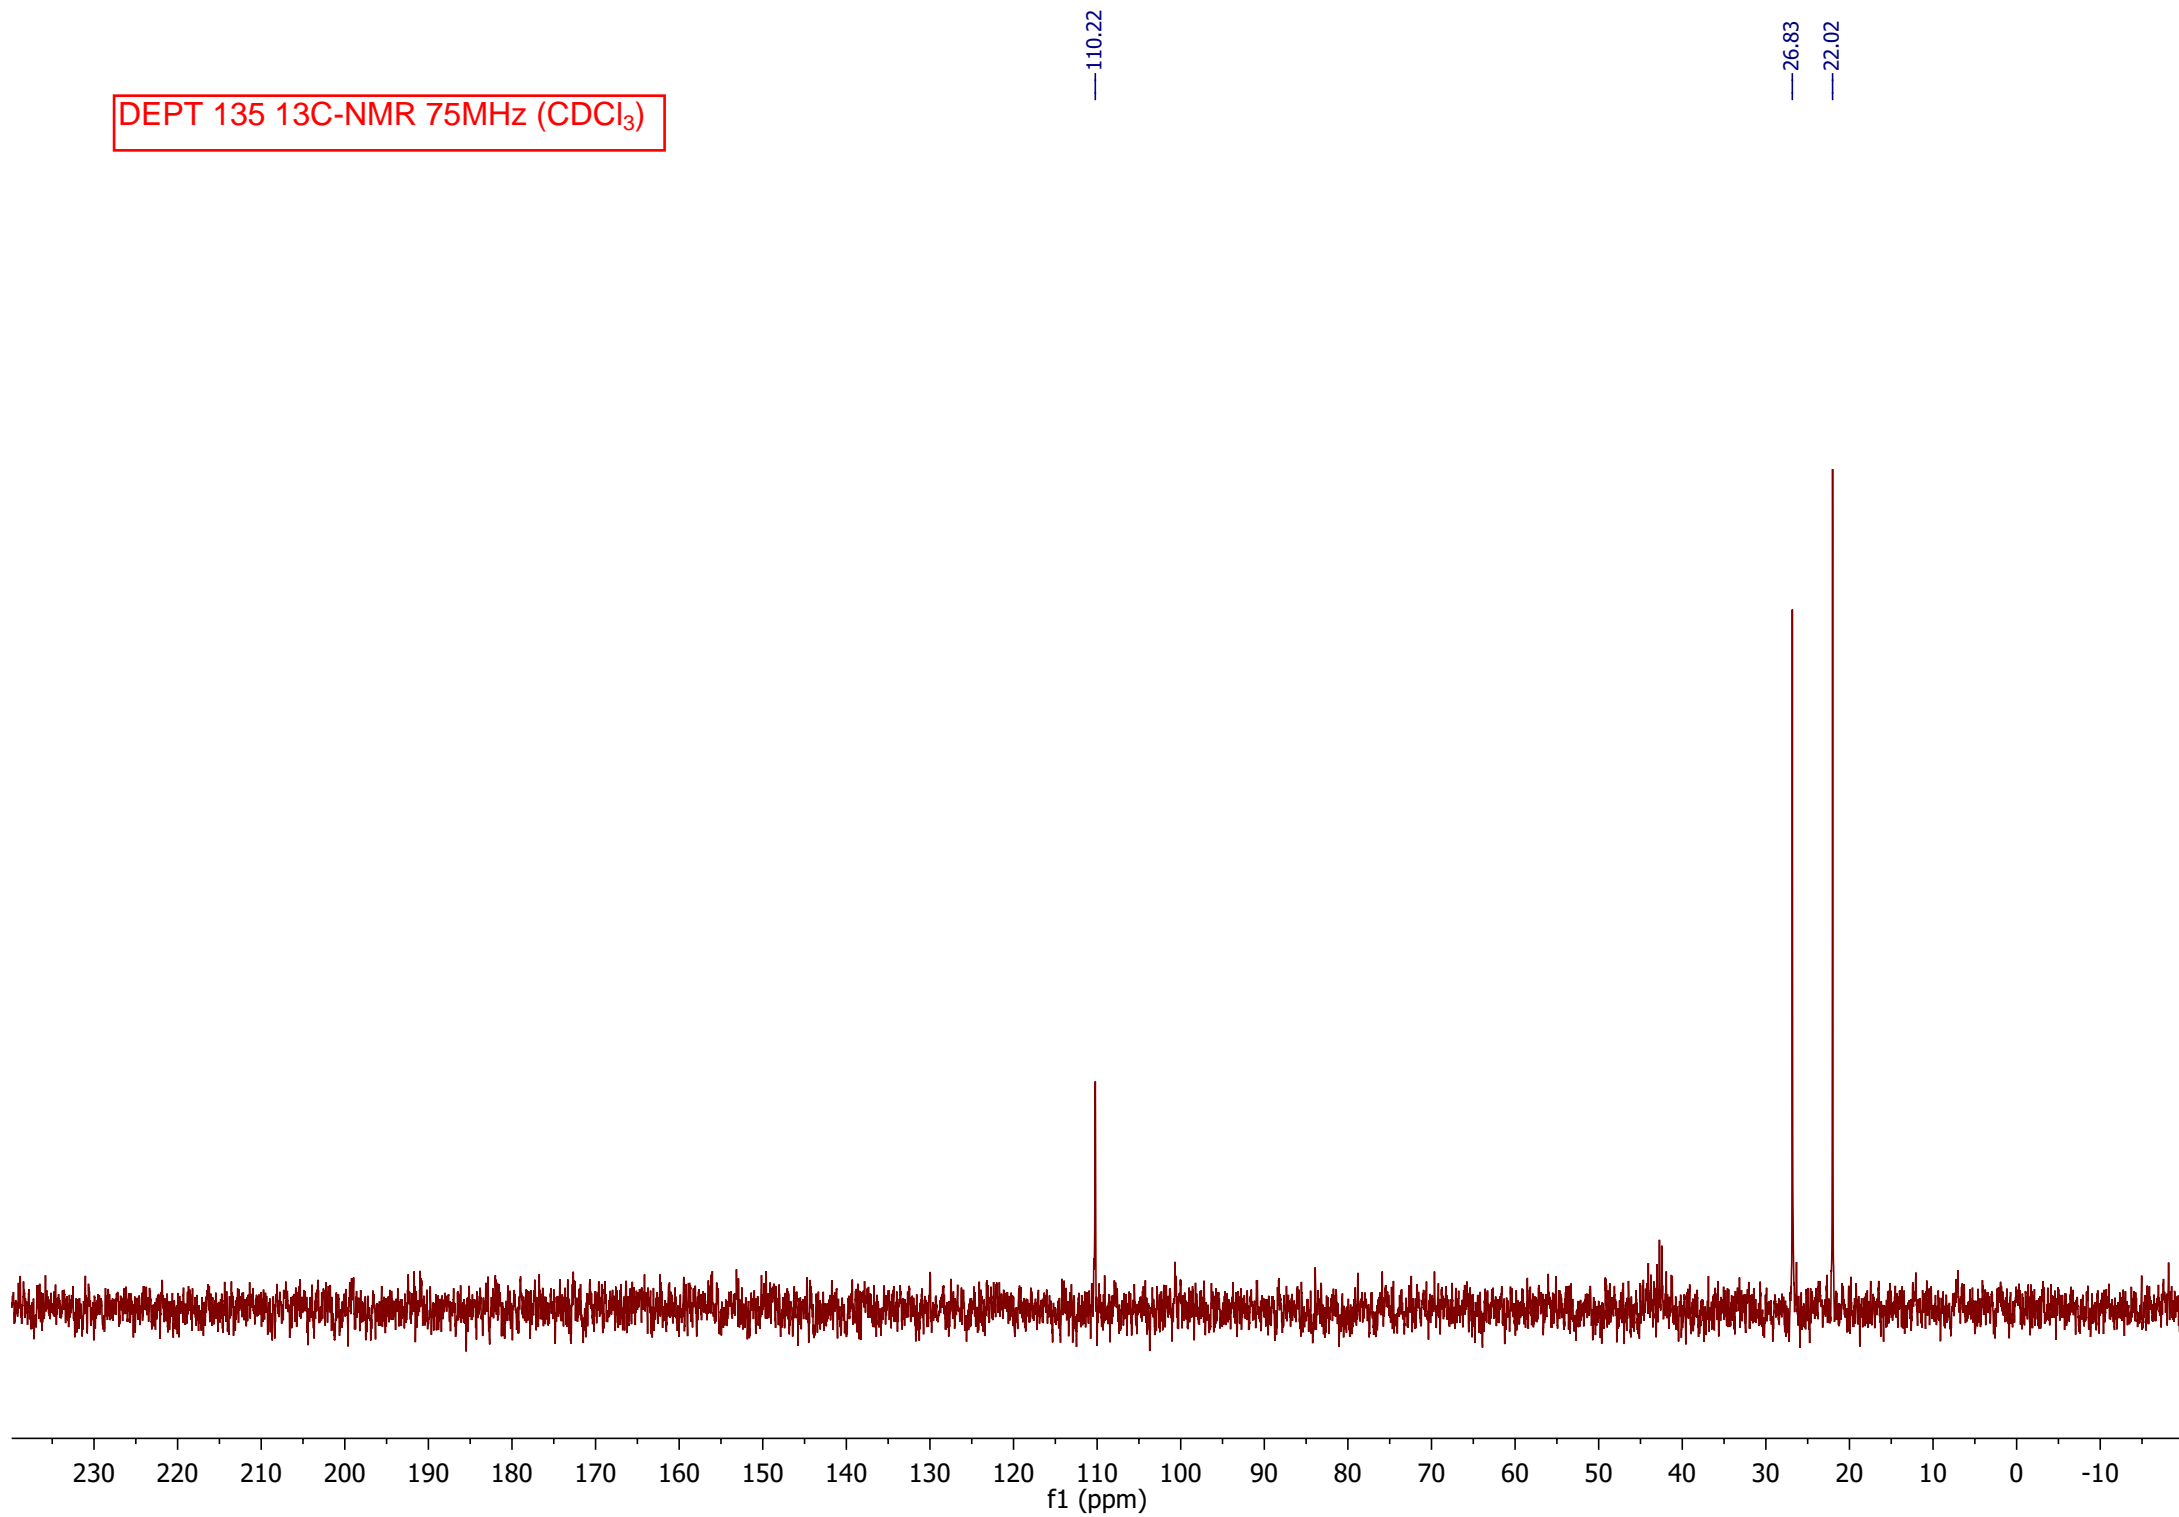

## Abstract

## Experimental

### Crystal data

|                              |                                                        |
|------------------------------|--------------------------------------------------------|
| $C_8H_9NO_3$                 | $\gamma = 111.168 (19)^\circ$                          |
| $M_r = 167.16$               | $V = 757.3 (6) \text{ \AA}^3$                          |
| Triclinic, $P1$              | $Z = 4$                                                |
| $a = 6.650 (3) \text{ \AA}$  | Mo $K\alpha$ radiation, $\lambda = 0.7107 \text{ \AA}$ |
| $b = 8.898 (4) \text{ \AA}$  | $\mu = 0.11 \text{ mm}^{-1}$                           |
| $c = 13.970 (6) \text{ \AA}$ | $T = 100 \text{ K}$                                    |
| $\alpha = 92.24 (2)^\circ$   | $0.53 \times 0.03 \times 0.03 \text{ mm}$              |
| $\beta = 98.98 (2)^\circ$    |                                                        |

### Data collection

|                                                  |                                        |
|--------------------------------------------------|----------------------------------------|
| BRUKER APPEX-II CCD                              | 11046 measured reflections             |
| diffractometer                                   | 3506 independent reflections           |
| Absorption correction: Multi-scan                | 1756 reflections with $I > 2\sigma(I)$ |
| BRUKER TWINABS                                   | $R_{\text{int}} = 0.111$               |
| $T_{\text{min}} = 0.721, T_{\text{max}} = 0.982$ |                                        |

### Refinement

|                                 |                                                                        |
|---------------------------------|------------------------------------------------------------------------|
| $R[F^2 > 2\sigma(F^2)] = 0.071$ | 3 restraints                                                           |
| $wR(F^2) = 0.189$               | H atoms treated by a mixture of independent and constrained refinement |
| $S = 1.00$                      | $\Delta\rho_{\text{max}} = 0.32 \text{ e \AA}^{-3}$                    |
| 3506 reflections                | $\Delta\rho_{\text{min}} = -0.32 \text{ e \AA}^{-3}$                   |
| 234 parameters                  |                                                                        |

**Table 1**

Hydrogen-bond geometry ( $\text{\AA}, ^\circ$ )

| $D-H\cdots A$              | $D-H$    | $H\cdots A$ | $D\cdots A$ | $D-H\cdots A$ |
|----------------------------|----------|-------------|-------------|---------------|
| $N31-H31B\cdots O40$       | 0.89 (2) | 1.81 (4)    | 2.582 (6)   | 143 (5)       |
| $N31-H31A\cdots O40B^i$    | 0.90 (5) | 2.06 (5)    | 2.941 (6)   | 168 (6)       |
| $N31B-H31C\cdots O40B$     | 0.90 (2) | 1.78 (3)    | 2.589 (6)   | 148 (5)       |
| $N31B-H31D\cdots O20^{ii}$ | 0.91 (2) | 2.08 (4)    | 2.854 (6)   | 143 (5)       |

Symmetry codes: (i)  $x-1, y-1, z$ ; (ii)  $-x+1, -y+2, -z$ .

Data collection: APPEX2 (BRUKER AXS, 2005); cell refinement: APPEX2 (BRUKER AXS, 2005); data reduction: APPEX2 (BRUKER AXS, 2005); program(s) used to solve structure: *SHELXS86* (Sheldrick, 1986); program(s) used to refine structure: *SHELXL2012* (Sheldrick, 2012); molecular graphics: *ORTEP-3 for Windows* (Farrugia, 1997); software used to prepare material for publication: *WinGX* publication routines (Farrugia, 1999).

## References

NOT FOUND

# supplementary materials

## Experimental

### (twin5)

#### Crystal data

|                               |                                                        |
|-------------------------------|--------------------------------------------------------|
| $C_8H_9NO_3$                  | $Z = 4$                                                |
| $M_r = 167.16$                | $F(000) = 352$                                         |
| Triclinic, $P\bar{1}$         | $D_x = 1.466 \text{ Mg m}^{-3}$                        |
| Hall symbol: $-P\ 1$          | Mo $K\alpha$ radiation, $\lambda = 0.7107 \text{ \AA}$ |
| $a = 6.650 (3) \text{ \AA}$   | Cell parameters from 928 reflections                   |
| $b = 8.898 (4) \text{ \AA}$   | $\theta = 0.3\text{--}18.7^\circ$                      |
| $c = 13.970 (6) \text{ \AA}$  | $\mu = 0.11 \text{ mm}^{-1}$                           |
| $\alpha = 92.24 (2)^\circ$    | $T = 100 \text{ K}$                                    |
| $\beta = 98.98 (2)^\circ$     | Prism, Colourless                                      |
| $\gamma = 111.168 (19)^\circ$ | $0.53 \times 0.03 \times 0.03 \text{ mm}$              |
| $V = 757.3 (6) \text{ \AA}^3$ |                                                        |

#### Data collection

|                                                     |                                                                        |
|-----------------------------------------------------|------------------------------------------------------------------------|
| BRUKER APPEX-II CCD                                 | 3506 independent reflections                                           |
| diffractometer                                      | 1756 reflections with $I > 2\sigma(I)$                                 |
| Radiation source: fine-focus sealed tube            | $R_{\text{int}} = 0.111$                                               |
| $\omega$ and phi scans                              | $\theta_{\text{max}} = 25.4^\circ$ , $\theta_{\text{min}} = 1.5^\circ$ |
| Absorption correction: Multi-scan                   | $h = -8 \rightarrow 7$                                                 |
| BRUKER TWINABS                                      | $k = -10 \rightarrow 10$                                               |
| $T_{\text{min}} = 0.721$ , $T_{\text{max}} = 0.982$ | $l = 0 \rightarrow 16$                                                 |
| 11046 measured reflections                          |                                                                        |

#### Refinement

|                                 |                                                                        |
|---------------------------------|------------------------------------------------------------------------|
| Refinement on $F^2$             | Hydrogen site location: Mixed                                          |
| Least-squares matrix: Full      | H atoms treated by a mixture of independent and constrained refinement |
| $R[F^2 > 2\sigma(F^2)] = 0.071$ | $w = 1/[\sigma^2(F_o^2) + (0.0842P)^2]$                                |
| $wR(F^2) = 0.189$               | where $P = (F_o^2 + 2F_c^2)/3$                                         |
| $S = 1.00$                      | $(\Delta/\sigma)_{\text{max}} < 0.001$                                 |
| 3506 reflections                | $\Delta\rho_{\text{max}} = 0.32 \text{ e \AA}^{-3}$                    |
| 234 parameters                  | $\Delta\rho_{\text{min}} = -0.32 \text{ e \AA}^{-3}$                   |
| 3 restraints                    |                                                                        |

#### Special details

**Geometry.** All esds (except the esd in the dihedral angle between two l.s. planes) are estimated using the full covariance matrix. The cell esds are taken into account individually in the estimation of esds in distances, angles and torsion angles; correlations between esds in cell parameters are only used when they are defined by crystal symmetry. An approximate (isotropic) treatment of cell esds is used for estimating esds involving l.s. planes.

**Refinement.** The crystal was found to be a non-merohedral twin with the twin components related by a 180.0 degree rotation about the real  $[1\ 0\ 0]$  axis. TWINABS was used to apply post-collection corrections. Both twin components were used in corrections and overlaps in addition to the two components were included in the reflection file. An additional parameter was included on the refinement to properly calculate the twin ratio 0.574 (3)/0.426 (3).

Refinement of  $F^2$  against ALL reflections. The weighted R-factor  $wR$  and goodness of fit  $S$  are based on  $F^2$ , conventional R-factors  $R$  are based on  $F$ , with  $F$  set to zero for negative  $F^2$ . The threshold expression of  $F^2 > 2\sigma(F^2)$  is used only for calculating R-factors(gt) etc. and is not relevant to the choice of reflections for refinement. R-factors based on  $F^2$  are statistically about twice as large as those based on  $F$ , and R-factors based on ALL data will be even larger.

*Fractional atomic coordinates and isotropic or equivalent isotropic displacement parameters ( $\text{\AA}^2$ )*

|      | <i>x</i>    | <i>y</i>   | <i>z</i>   | $U_{\text{iso}}^*/U_{\text{eq}}$ |
|------|-------------|------------|------------|----------------------------------|
| O1   | 0.3141 (8)  | 0.9967 (4) | 0.1984 (2) | 0.0225 (9)                       |
| C2   | 0.2254 (12) | 0.8295 (6) | 0.1790 (4) | 0.0175 (13)                      |
| C3   | 0.2028 (11) | 0.7325 (6) | 0.2587 (4) | 0.0175 (12)                      |
| C4   | 0.2680 (10) | 0.8094 (6) | 0.3578 (4) | 0.0142 (12)                      |
| C5   | 0.3651 (10) | 0.9848 (6) | 0.3691 (4) | 0.0189 (13)                      |
| H5   | 0.4178      | 1.0403     | 0.4328     | 0.023*                           |
| C6   | 0.3826 (11) | 1.0706 (6) | 0.2925 (4) | 0.0172 (13)                      |
| O20  | 0.1736 (8)  | 0.7847 (4) | 0.0914 (3) | 0.0251 (9)                       |
| C30  | 0.1133 (11) | 0.5610 (6) | 0.2398 (4) | 0.0192 (13)                      |
| N31  | 0.0851 (11) | 0.4716 (5) | 0.3124 (3) | 0.0226 (12)                      |
| H31A | 0.041 (11)  | 0.363 (6)  | 0.303 (4)  | 0.027*                           |
| H31B | 0.113 (11)  | 0.530 (5)  | 0.370 (2)  | 0.027*                           |
| C32  | 0.0470 (12) | 0.4739 (6) | 0.1401 (4) | 0.0348 (17)                      |
| H32A | −0.0006     | 0.357      | 0.1445     | 0.052*                           |
| H32B | 0.172       | 0.5089     | 0.1061     | 0.052*                           |
| H32C | −0.0741     | 0.4985     | 0.1039     | 0.052*                           |
| O40  | 0.2548 (7)  | 0.7329 (4) | 0.4314 (3) | 0.0221 (9)                       |
| C60  | 0.4778 (11) | 1.2482 (6) | 0.2949 (4) | 0.0279 (15)                      |
| H60A | 0.5363      | 1.2963     | 0.3625     | 0.042*                           |
| H60B | 0.364       | 1.2876     | 0.2666     | 0.042*                           |
| H60C | 0.5964      | 1.2789     | 0.2571     | 0.042*                           |
| O1B  | 0.6815 (7)  | 0.6434 (4) | 0.3058 (2) | 0.0222 (9)                       |
| C2B  | 0.6652 (13) | 0.6798 (7) | 0.2083 (4) | 0.0222 (13)                      |
| C3B  | 0.7364 (11) | 0.8463 (6) | 0.1901 (4) | 0.0149 (12)                      |
| C4B  | 0.8176 (12) | 0.9701 (6) | 0.2700 (4) | 0.0162 (12)                      |
| C5B  | 0.8181 (10) | 0.9179 (6) | 0.3666 (4) | 0.0160 (13)                      |
| H5B  | 0.8652      | 0.9972     | 0.4212     | 0.019*                           |
| C6B  | 0.7548 (11) | 0.7620 (6) | 0.3814 (4) | 0.0161 (13)                      |
| O20B | 0.5945 (9)  | 0.5595 (4) | 0.1500 (3) | 0.0351 (11)                      |
| C30B | 0.7229 (12) | 0.8834 (6) | 0.0912 (4) | 0.0184 (12)                      |
| N31B | 0.7839 (12) | 1.0359 (6) | 0.0741 (3) | 0.0281 (13)                      |
| H31C | 0.845 (12)  | 1.100 (5)  | 0.131 (2)  | 0.034*                           |
| H31D | 0.807 (10)  | 1.052 (6)  | 0.012 (2)  | 0.034*                           |
| C32B | 0.6384 (12) | 0.7616 (6) | 0.0039 (4) | 0.0292 (15)                      |
| H32D | 0.6327      | 0.817      | −0.0551    | 0.044*                           |
| H32E | 0.4908      | 0.6859     | 0.0076     | 0.044*                           |
| H32F | 0.7361      | 0.7018     | 0.0019     | 0.044*                           |
| O40B | 0.8877 (8)  | 1.1189 (4) | 0.2603 (2) | 0.0217 (9)                       |
| C60B | 0.7509 (11) | 0.6911 (7) | 0.4758 (4) | 0.0277 (15)                      |
| H60D | 0.804       | 0.7783     | 0.5294     | 0.042*                           |
| H60E | 0.8457      | 0.6282     | 0.4817     | 0.042*                           |
| H60F | 0.6004      | 0.6201     | 0.4788     | 0.042*                           |

*Atomic displacement parameters ( $\text{\AA}^2$ )*

|    | $U^{11}$  | $U^{22}$  | $U^{33}$  | $U^{12}$  | $U^{13}$   | $U^{23}$    |
|----|-----------|-----------|-----------|-----------|------------|-------------|
| O1 | 0.026 (3) | 0.018 (2) | 0.020 (2) | 0.005 (3) | −0.002 (3) | 0.0059 (17) |
| C2 | 0.013 (4) | 0.020 (3) | 0.019 (3) | 0.006 (4) | 0.000 (4)  | 0.003 (3)   |
| C3 | 0.015 (4) | 0.018 (3) | 0.018 (3) | 0.003 (4) | 0.006 (4)  | 0.003 (2)   |
| C4 | 0.008 (4) | 0.018 (3) | 0.017 (3) | 0.004 (4) | 0.005 (4)  | 0.008 (3)   |
| C5 | 0.015 (4) | 0.022 (3) | 0.018 (3) | 0.007 (4) | 0.001 (4)  | 0.001 (3)   |

|      |           |           |           |           |            |             |
|------|-----------|-----------|-----------|-----------|------------|-------------|
| C6   | 0.012 (4) | 0.020 (3) | 0.017 (3) | 0.006 (4) | −0.005 (4) | −0.002 (3)  |
| O20  | 0.036 (3) | 0.021 (2) | 0.018 (2) | 0.013 (3) | 0.002 (3)  | 0.0025 (18) |
| C30  | 0.016 (4) | 0.019 (3) | 0.023 (3) | 0.007 (4) | 0.003 (4)  | 0.002 (3)   |
| N31  | 0.033 (4) | 0.014 (3) | 0.023 (3) | 0.010 (4) | 0.006 (4)  | 0.006 (2)   |
| C32  | 0.057 (5) | 0.014 (3) | 0.023 (3) | 0.001 (5) | 0.008 (5)  | 0.000 (3)   |
| O40  | 0.029 (3) | 0.015 (2) | 0.023 (2) | 0.009 (3) | 0.008 (3)  | 0.0059 (17) |
| C60  | 0.028 (4) | 0.019 (3) | 0.036 (4) | 0.003 (4) | 0.018 (4)  | 0.005 (3)   |
| O1B  | 0.024 (3) | 0.019 (2) | 0.021 (2) | 0.005 (3) | 0.004 (3)  | 0.0039 (17) |
| C2B  | 0.030 (5) | 0.023 (3) | 0.016 (3) | 0.014 (5) | 0.001 (5)  | 0.005 (3)   |
| C3B  | 0.015 (4) | 0.015 (3) | 0.019 (3) | 0.010 (4) | 0.006 (4)  | 0.005 (2)   |
| C4B  | 0.013 (4) | 0.016 (3) | 0.019 (3) | 0.005 (4) | 0.006 (4)  | 0.007 (2)   |
| C5B  | 0.016 (4) | 0.010 (3) | 0.017 (3) | 0.000 (4) | 0.000 (4)  | 0.000 (2)   |
| C6B  | 0.012 (4) | 0.018 (3) | 0.016 (3) | 0.006 (4) | −0.005 (4) | 0.000 (3)   |
| O20B | 0.056 (3) | 0.015 (2) | 0.024 (2) | 0.006 (3) | −0.003 (4) | 0.0002 (19) |
| C30B | 0.019 (4) | 0.013 (3) | 0.024 (3) | 0.006 (4) | 0.006 (5)  | 0.007 (2)   |
| N31B | 0.036 (4) | 0.025 (3) | 0.015 (3) | 0.000 (4) | 0.005 (4)  | 0.006 (2)   |
| C32B | 0.045 (5) | 0.024 (3) | 0.018 (3) | 0.010 (5) | 0.013 (5)  | −0.003 (3)  |
| O40B | 0.027 (3) | 0.015 (2) | 0.023 (2) | 0.006 (3) | 0.009 (3)  | 0.0066 (17) |
| C60B | 0.028 (4) | 0.028 (3) | 0.026 (4) | 0.007 (4) | 0.010 (4)  | 0.007 (3)   |

*Geometric parameters (Å, °)*

|           |           |              |           |
|-----------|-----------|--------------|-----------|
| O1—C6     | 1.377 (6) | O1B—C6B      | 1.360 (6) |
| O1—C2     | 1.385 (6) | O1B—C2B      | 1.409 (6) |
| C2—O20    | 1.227 (6) | C2B—O20B     | 1.216 (6) |
| C2—C3     | 1.429 (7) | C2B—C3B      | 1.430 (7) |
| C3—C30    | 1.420 (7) | C3B—C4B      | 1.426 (7) |
| C3—C4     | 1.448 (6) | C3B—C30B     | 1.430 (7) |
| C4—O40    | 1.253 (5) | C4B—O40B     | 1.256 (5) |
| C4—C5     | 1.449 (7) | C4B—C5B      | 1.445 (7) |
| C5—C6     | 1.334 (7) | C5B—C6B      | 1.331 (7) |
| C5—H5     | 0.95      | C5B—H5B      | 0.95      |
| C6—C60    | 1.472 (6) | C6B—C60B     | 1.484 (7) |
| C30—N31   | 1.308 (7) | C30B—N31B    | 1.312 (6) |
| C30—C32   | 1.488 (7) | C30B—C32B    | 1.490 (7) |
| N31—H31A  | 0.90 (5)  | N31B—H31C    | 0.90 (2)  |
| N31—H31B  | 0.89 (2)  | N31B—H31D    | 0.91 (2)  |
| C32—H32A  | 0.98      | C32B—H32D    | 0.98      |
| C32—H32B  | 0.98      | C32B—H32E    | 0.98      |
| C32—H32C  | 0.98      | C32B—H32F    | 0.98      |
| C60—H60A  | 0.98      | C60B—H60D    | 0.98      |
| C60—H60B  | 0.98      | C60B—H60E    | 0.98      |
| C60—H60C  | 0.98      | C60B—H60F    | 0.98      |
|           |           |              |           |
| C6—O1—C2  | 121.4 (4) | C6B—O1B—C2B  | 121.5 (4) |
| O20—C2—O1 | 112.7 (4) | O20B—C2B—O1B | 112.8 (5) |
| O20—C2—C3 | 128.3 (5) | O20B—C2B—C3B | 128.8 (5) |
| O1—C2—C3  | 118.9 (4) | O1B—C2B—C3B  | 118.3 (5) |
| C30—C3—C2 | 119.5 (5) | C4B—C3B—C30B | 121.9 (5) |
| C30—C3—C4 | 120.5 (5) | C4B—C3B—C2B  | 119.8 (5) |
| C2—C3—C4  | 119.9 (4) | C30B—C3B—C2B | 118.3 (5) |
| O40—C4—C3 | 123.8 (5) | O40B—C4B—C3B | 123.7 (5) |
| O40—C4—C5 | 120.0 (5) | O40B—C4B—C5B | 119.4 (5) |
| C3—C4—C5  | 116.2 (4) | C3B—C4B—C5B  | 116.9 (5) |

|               |            |                   |            |
|---------------|------------|-------------------|------------|
| C6—C5—C4      | 121.8 (5)  | C6B—C5B—C4B       | 122.0 (5)  |
| C6—C5—H5      | 119.1      | C6B—C5B—H5B       | 119        |
| C4—C5—H5      | 119.1      | C4B—C5B—H5B       | 119        |
| C5—C6—O1      | 121.7 (5)  | C5B—C6B—O1B       | 121.4 (5)  |
| C5—C6—C60     | 126.7 (5)  | C5B—C6B—C60B      | 127.9 (5)  |
| O1—C6—C60     | 111.6 (4)  | O1B—C6B—C60B      | 110.7 (4)  |
| N31—C30—C3    | 119.8 (5)  | N31B—C30B—C3B     | 118.6 (5)  |
| N31—C30—C32   | 116.7 (5)  | N31B—C30B—C32B    | 116.2 (5)  |
| C3—C30—C32    | 123.4 (5)  | C3B—C30B—C32B     | 125.2 (5)  |
| C30—N31—H31A  | 122 (3)    | C30B—N31B—H31C    | 110 (3)    |
| C30—N31—H31B  | 113 (3)    | C30B—N31B—H31D    | 113 (3)    |
| H31A—N31—H31B | 125 (5)    | H31C—N31B—H31D    | 131 (5)    |
| C30—C32—H32A  | 109.5      | C30B—C32B—H32D    | 109.5      |
| C30—C32—H32B  | 109.5      | C30B—C32B—H32E    | 109.5      |
| H32A—C32—H32B | 109.5      | H32D—C32B—H32E    | 109.5      |
| C30—C32—H32C  | 109.5      | C30B—C32B—H32F    | 109.5      |
| H32A—C32—H32C | 109.5      | H32D—C32B—H32F    | 109.5      |
| H32B—C32—H32C | 109.5      | H32E—C32B—H32F    | 109.5      |
| C6—C60—H60A   | 109.5      | C6B—C60B—H60D     | 109.5      |
| C6—C60—H60B   | 109.5      | C6B—C60B—H60E     | 109.5      |
| H60A—C60—H60B | 109.5      | H60D—C60B—H60E    | 109.5      |
| C6—C60—H60C   | 109.5      | C6B—C60B—H60F     | 109.5      |
| H60A—C60—H60C | 109.5      | H60D—C60B—H60F    | 109.5      |
| H60B—C60—H60C | 109.5      | H60E—C60B—H60F    | 109.5      |
| C6—O1—C2—O20  | −179.9 (7) | C6B—O1B—C2B—O20B  | −179.2 (7) |
| C6—O1—C2—C3   | 0.7 (10)   | C6B—O1B—C2B—C3B   | 2.5 (10)   |
| O20—C2—C3—C30 | 1.0 (13)   | O20B—C2B—C3B—C4B  | −179.1 (9) |
| O1—C2—C3—C30  | −179.6 (7) | O1B—C2B—C3B—C4B   | −1.1 (11)  |
| O20—C2—C3—C4  | −178.0 (8) | O20B—C2B—C3B—C30B | 1.1 (14)   |
| O1—C2—C3—C4   | 1.3 (11)   | O1B—C2B—C3B—C30B  | 179.1 (7)  |
| C30—C3—C4—O40 | 1.5 (11)   | C30B—C3B—C4B—O40B | −1.9 (12)  |
| C2—C3—C4—O40  | −179.5 (7) | C2B—C3B—C4B—O40B  | 178.3 (8)  |
| C30—C3—C4—C5  | 177.7 (7)  | C30B—C3B—C4B—C5B  | 178.4 (7)  |
| C2—C3—C4—C5   | −3.2 (10)  | C2B—C3B—C4B—C5B   | −1.4 (11)  |
| O40—C4—C5—C6  | 179.8 (7)  | O40B—C4B—C5B—C6B  | −177.0 (7) |
| C3—C4—C5—C6   | 3.4 (10)   | C3B—C4B—C5B—C6B   | 2.7 (10)   |
| C4—C5—C6—O1   | −1.6 (12)  | C4B—C5B—C6B—O1B   | −1.4 (11)  |
| C4—C5—C6—C60  | −180.0 (7) | C4B—C5B—C6B—C60B  | 178.7 (7)  |
| C2—O1—C6—C5   | −0.6 (11)  | C2B—O1B—C6B—C5B   | −1.3 (10)  |
| C2—O1—C6—C60  | 178.0 (6)  | C2B—O1B—C6B—C60B  | 178.6 (6)  |
| C2—C3—C30—N31 | −177.6 (7) | C4B—C3B—C30B—N31B | −1.2 (11)  |
| C4—C3—C30—N31 | 1.4 (11)   | C2B—C3B—C30B—N31B | 178.7 (8)  |
| C2—C3—C30—C32 | 2.2 (12)   | C4B—C3B—C30B—C32B | −179.4 (8) |
| C4—C3—C30—C32 | −178.7 (7) | C2B—C3B—C30B—C32B | 0.4 (11)   |

Hydrogen-bond geometry (Å, °)

| <i>D</i> —H... <i>A</i>      | <i>D</i> —H | H... <i>A</i> | <i>D</i> ... <i>A</i> | <i>D</i> —H... <i>A</i> |
|------------------------------|-------------|---------------|-----------------------|-------------------------|
| N31—H31B...O40               | 0.89 (2)    | 1.81 (4)      | 2.582 (6)             | 143 (5)                 |
| N31—H31A...O40B <sup>i</sup> | 0.90 (5)    | 2.06 (5)      | 2.941 (6)             | 168 (6)                 |



supplementary materials

---

|                                                 |          |          |           |         |
|-------------------------------------------------|----------|----------|-----------|---------|
| N31 <i>B</i> —H31 <i>C</i> ···O40 <i>B</i>      | 0.90 (2) | 1.78 (3) | 2.589 (6) | 148 (5) |
| N31 <i>B</i> —H31 <i>D</i> ···O20 <sup>ii</sup> | 0.91 (2) | 2.08 (4) | 2.854 (6) | 143 (5) |

---

Symmetry codes: (i)  $x-1, y-1, z$ ; (ii)  $-x+1, -y+2, -z$ .
